# Supplementary material
Source: PubMed Central journal article supplement (PMC10468119)
Supplement: JSLHR-66-2278-s001.pdf [file JSLHR-66-2278-s001.pdf]

**Supplemental Material S1.** Internal consistency of OASES and CYRM-R sections (Cronbach's alpha).

| <b>Factors</b>             | <b>OASES-EC-P</b> | <b>OASES-S</b> | <b>OASES-T</b> | <b>CYRM-C</b> | <b>CYRM-Y</b> | <b>PMK-CYRM</b> |
|----------------------------|-------------------|----------------|----------------|---------------|---------------|-----------------|
| OASES Sec 1. Gen Info      | .39               | .75            | .74            | -             | -             | -               |
| OASES Sec 2. Reactions     | .91               | .94            | .92            | -             | -             | -               |
| OASES Sec 3. Daily Com.    | .91               | .93            | .92            | -             | -             | -               |
| OASES Sec 4. Qual. of Life | .89               | .87            | .94            | -             | -             | -               |
| CYRM Personal Subscale     | -                 | -              | -              | .79           | .81           | .87             |
| CYRM Caregiver Subscale    | -                 | -              | -              | .70           | .84           | .57             |

*Note.* Hyphen indicates item is non-applicable. OASES-EC-P = Overall Assessment of the Speaker's Experience of Stuttering (Early Childhood Parent version); OASES-S = Overall Assessment of the Speaker's Experience of Stuttering (Student version); OASES-T = Overall Assessment of the Speaker's Experience of Stuttering (Teen version); CYRM-C = Child Youth Resilience Measure (Child version); CYRM-Y = Child Youth Resilience Measure (Youth version); PMK-CYRM = Person Most Knowledgeable Child Youth Resilience Measure
